# Supplementary material for: Insights into the Evolution of Cotton Diploids and Polyploids from Whole-Genome Re-sequencing
Source: PubMed Central journal article supplement (PMC3789805; doi:10.1534/g3.113.007229), 2013-10-01
Supplement: supp_g3.113.007229_007229SI.pdf [file supp_g3.113.007229_007229SI.pdf]

## **Insights into the evolution of cotton diploids and polyploids from whole-genome re-sequencing**

Justin T. Page<sup>1</sup>, Mark D. Huynh<sup>2</sup>, Zach S. Liechty<sup>2</sup>, Kara Grupp<sup>3</sup>, David Stelly<sup>4</sup>, Amanda M. Hulse<sup>4</sup>, Hamid Ashrafi<sup>5</sup>, Allen Van Deynze<sup>5</sup>, Jonathan F. Wendel<sup>3</sup>, and Joshua A. Udall<sup>1,2</sup>

<sup>1</sup>Biology Department, Brigham Young University, Provo, UT, 84602

<sup>2</sup>Plant and Wildlife Science Department, Brigham Young University, Provo, UT, 84602

<sup>3</sup>Department of Ecology, Evolution, and Organismal Biology, Iowa State University, Ames, IA, 50011

<sup>4</sup>Department of Soil & Crop Sciences, Texas AgriLife Research, College Station, TX, 77843

<sup>5</sup>Seed Biotechnology Center, University of California-Davis, Davis, CA, 95616

**DOI: 10.1534/g3.113.007229**

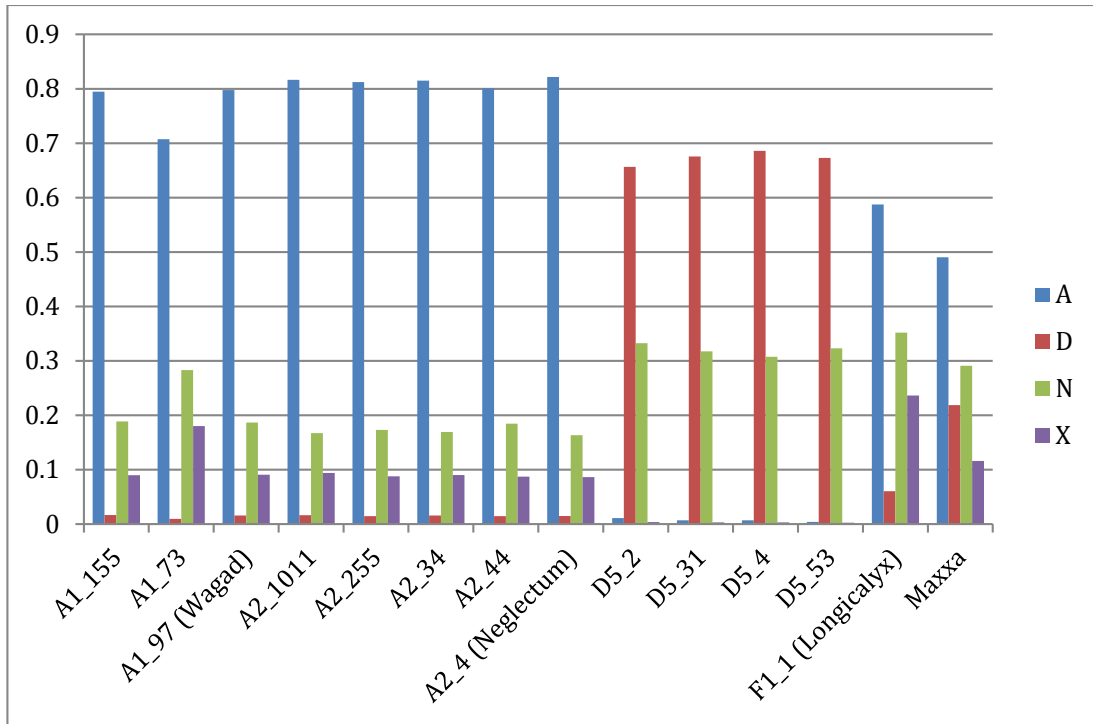

**Figure S1** PolyCat categorization of reads. For each accession, the fraction of reads categorized as A-genome (blue), D-genome (red), uncategorizable (green), and chimeric (purple). The uncategorizable reads are a superset of the chimeric reads.

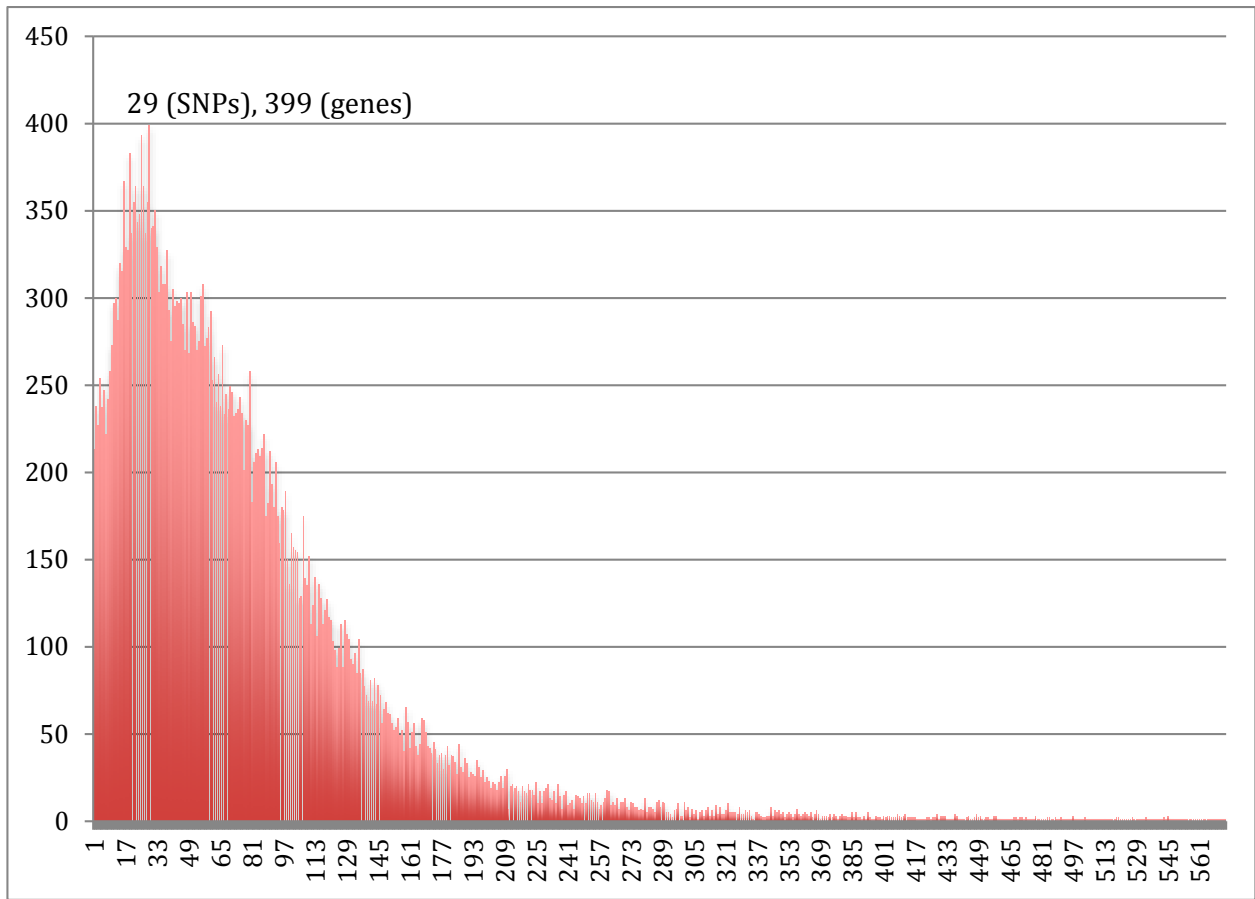

**Figure S2** Histogram of the number of homoeo-SNPs (x-axis) per gene (y-axis). Most genes had 30-40 homoeo-SNPs.

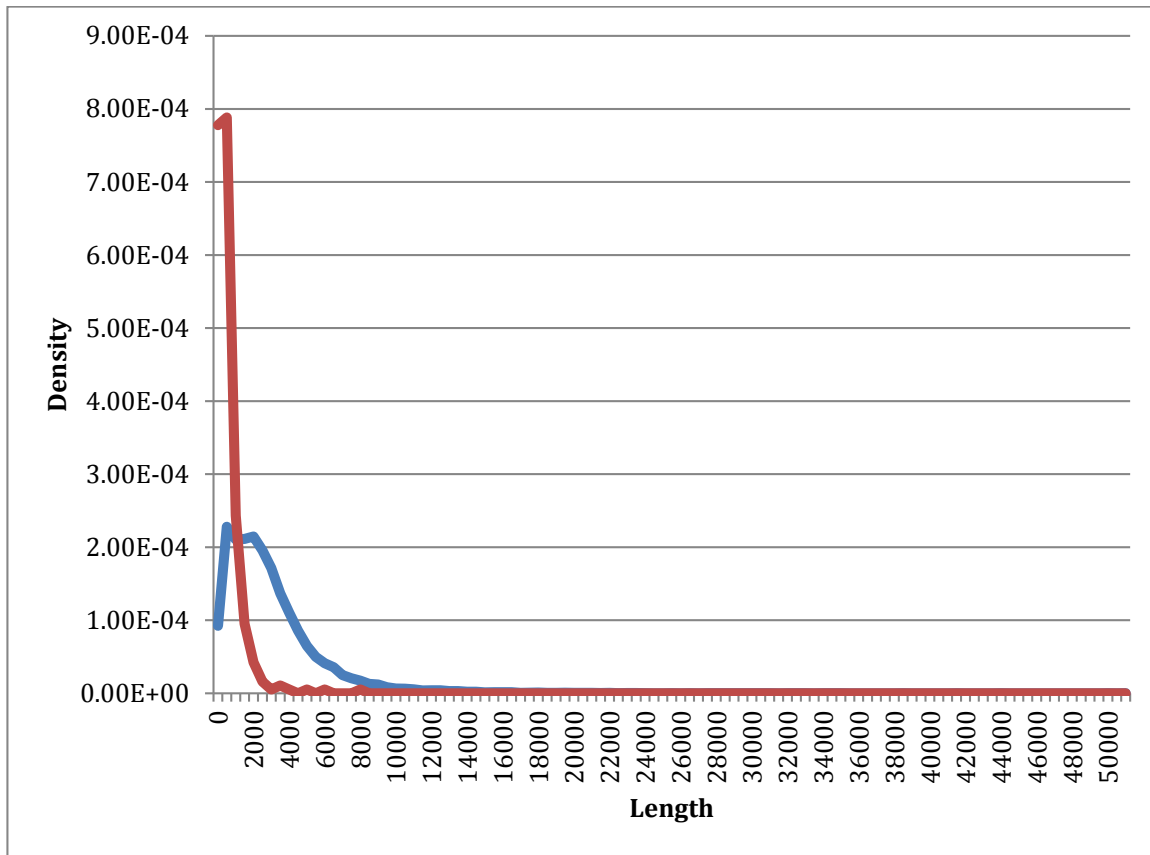

**Figure S3** The length distribution of genes without any SNPs and present in both genomes (red; N = 378) and the length distribution of all annotated genes (blue; N = 37,223).

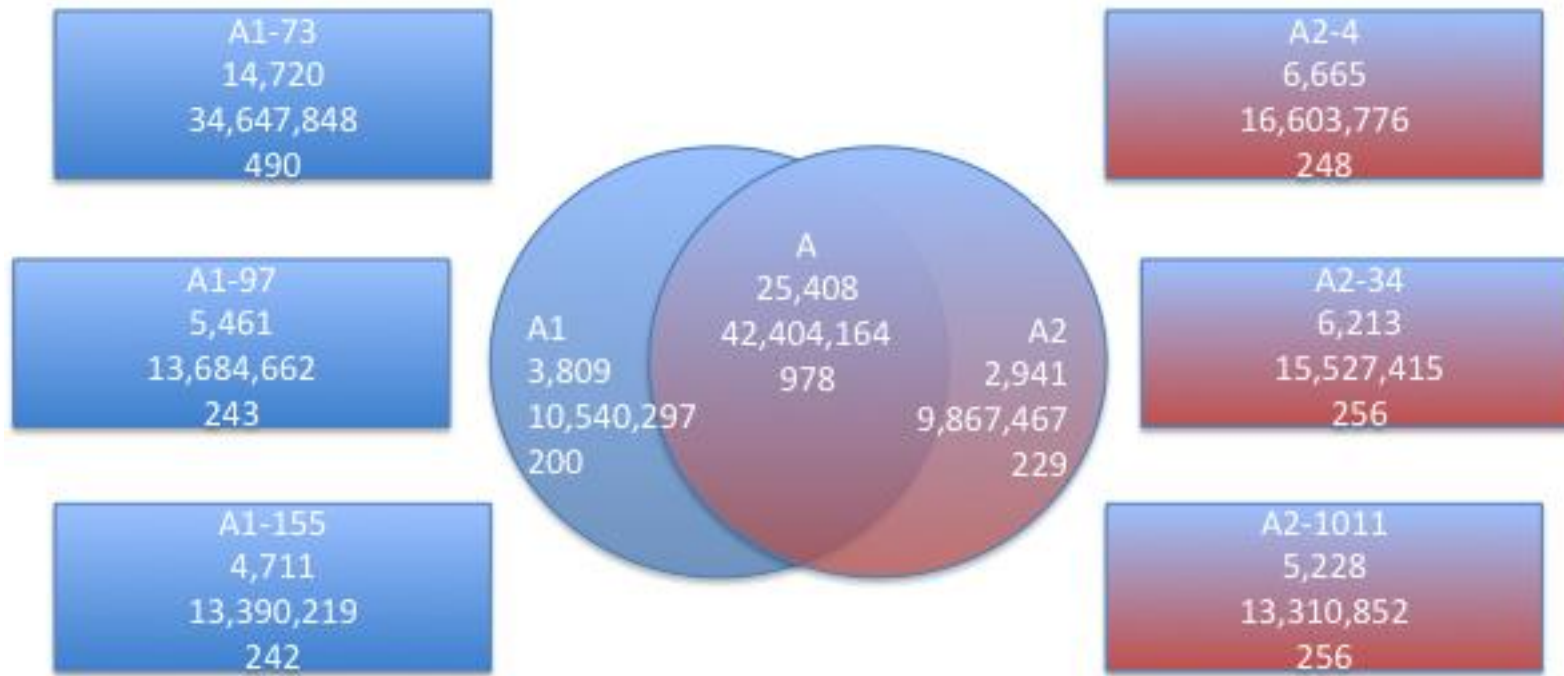

**Figure S4** A summary of the genomic deletions detected in the A-genome when sequencing reads were mapped to the D-genome reference. Each shape contains 1) accession ID, 2) the total number of deletions, 3) the sum total length of deletions in base-pairs, and 4) the number of deleted genes. Blue shapes indicate A<sub>1</sub>, and blue shapes indicate A<sub>2</sub>.

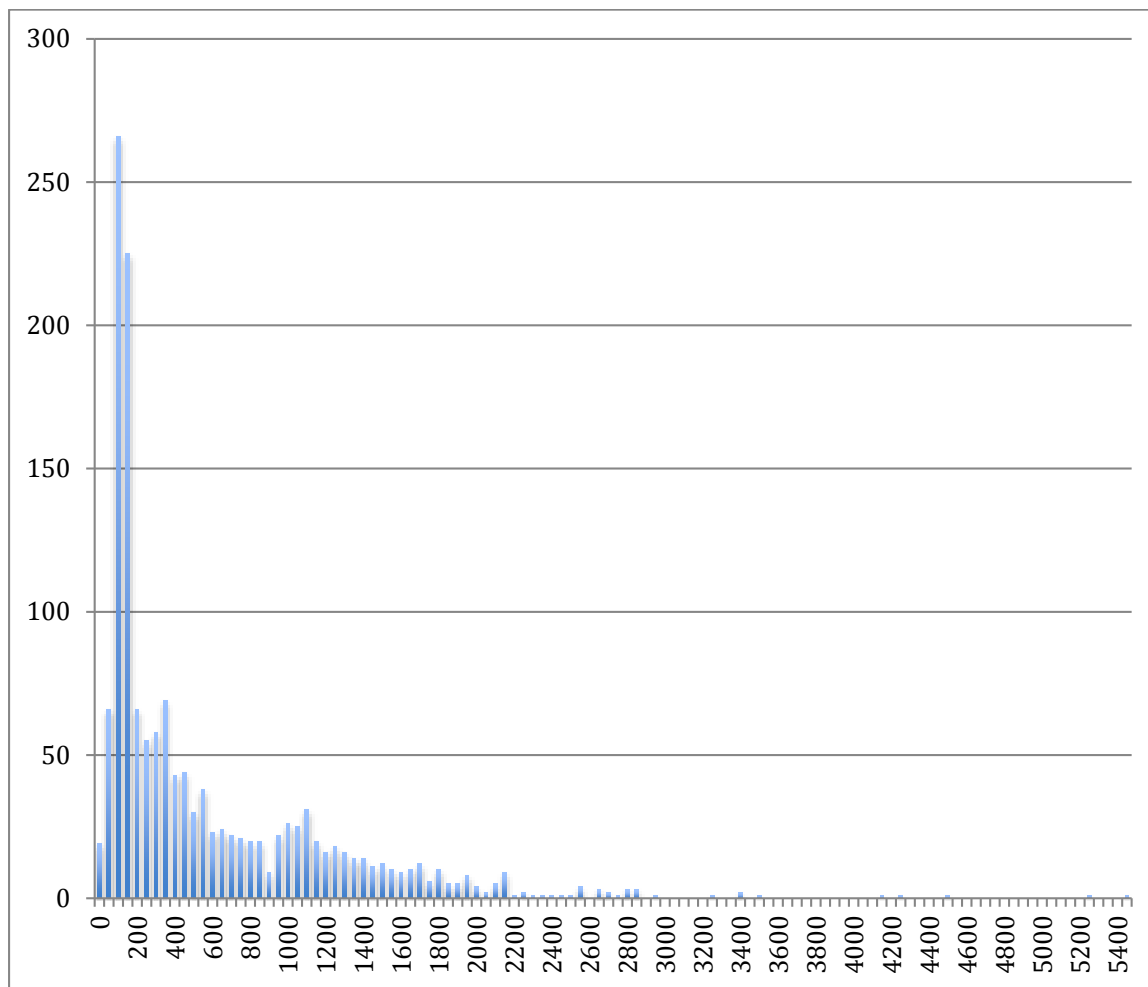

**Figure S5** A histogram of estimated lengths of regions of genome conversion.

**Table S1 Lists of GO terms enriched in genes without stop codons: D<sub>5</sub> reference (a), pseudo-A (b), pseudo-A<sub>T</sub> (c), pseudo-D<sub>T</sub> (d).**

a)

| GO Term    | Name                                                                                   | Type | FDR         | single test p-Value | # in test group | # in reference group | # non annot test | # non annot reference group | Over/Under |
|------------|----------------------------------------------------------------------------------------|------|-------------|---------------------|-----------------|----------------------|------------------|-----------------------------|------------|
| GO:0015979 | photosynthesis                                                                         | P    | 6.8E-10     | 9.3E-14             | 23              | 324                  | 209              | 25464                       | over       |
| GO:0022900 | electron transport chain                                                               | P    | 0.000000046 | 1.3E-11             | 20              | 301                  | 212              | 25487                       | over       |
| GO:0034357 | photosynthetic membrane                                                                | C    | 0.00000067  | 2.7E-10             | 26              | 634                  | 206              | 25154                       | over       |
| GO:0019684 | photosynthesis, light reaction                                                         | P    | 0.0000012   | 8.2E-10             | 15              | 196                  | 217              | 25592                       | over       |
| GO:0044436 | thylakoid part                                                                         | C    | 0.0000012   | 8.5E-10             | 26              | 670                  | 206              | 25118                       | over       |
| GO:0009767 | photosynthetic electron transport chain generation of precursor metabolites and energy | P    | 0.0000029   | 2.4E-09             | 11              | 93                   | 221              | 25695                       | over       |
| GO:0006091 | thylakoid membrane                                                                     | P    | 0.0000037   | 3.5E-09             | 24              | 615                  | 208              | 25173                       | over       |
| GO:0042651 | photosystem                                                                            | C    | 0.000015    | 0.000000016         | 23              | 615                  | 209              | 25173                       | over       |
| GO:0009521 | protein-chromophore linkage                                                            | C    | 0.000021    | 0.000000026         | 11              | 119                  | 221              | 25669                       | over       |
| GO:0018298 | chloroplast thylakoid membrane                                                         | P    | 0.000086    | 0.00000012          | 6               | 21                   | 226              | 25767                       | over       |
| GO:0009535 | plastid thylakoid membrane                                                             | C    | 0.000086    | 0.00000014          | 21              | 585                  | 211              | 25203                       | over       |
| GO:0055035 | thylakoid                                                                              | C    | 0.000086    | 0.00000014          | 21              | 586                  | 211              | 25202                       | over       |
| GO:0009579 | chlorophyll binding                                                                    | C    | 0.00017     | 0.0000003           | 26              | 906                  | 206              | 24882                       | over       |
| GO:0016168 | transferase activity, transferring phosphorus-containing groups                        | F    | 0.00039     | 0.00000074          | 7               | 50                   | 225              | 25738                       | over       |
| GO:0016772 | chloroplast thylakoid                                                                  | F    | 0.002       | 0.0000042           | 49              | 2788                 | 183              | 23000                       | over       |
| GO:0009534 | plastid thylakoid                                                                      | C    | 0.0023      | 0.0000053           | 21              | 741                  | 211              | 25047                       | over       |
| GO:0031976 | photosystem II                                                                         | C    | 0.0023      | 0.0000053           | 21              | 741                  | 211              | 25047                       | over       |
| GO:0009523 | organelle subcompartment photosynthesis, light harvesting in photosystem II            | C    | 0.0025      | 0.0000063           | 7               | 71                   | 225              | 25717                       | over       |
| GO:0031984 | chloroplast                                                                            | C    | 0.0025      | 0.0000065           | 21              | 751                  | 211              | 25037                       | over       |
| GO:0009769 | macromolecular complex                                                                 | P    | 0.005       | 0.000014            | 3               | 3                    | 229              | 25785                       | over       |
| GO:0009507 | catalytic activity                                                                     | C    | 0.0079      | 0.000023            | 53              | 3316                 | 179              | 22472                       | over       |
| GO:0032991 | electron carrier activity                                                              | C    | 0.021       | 0.000064            | 47              | 2923                 | 185              | 22865                       | over       |
| GO:0003824 | electron carrier activity                                                              | F    | 0.021       | 0.000065            | 145             | 12823                | 87               | 12965                       | over       |
| GO:0009055 |                                                                                        | F    | 0.05        | 0.00016             | 14              | 483                  | 218              | 25305                       | over       |

b)

| GO Term    | Name                                                                                | Type | FDR        | single test p-Value | # in test group | # in reference group | # non annot test | # non annot reference group | Over/Under |
|------------|-------------------------------------------------------------------------------------|------|------------|---------------------|-----------------|----------------------|------------------|-----------------------------|------------|
| GO:0015979 | photosynthesis                                                                      | P    | 0.00000025 | 3.4E-11             | 28              | 319                  | 434              | 25239                       | over       |
| GO:0022900 | electron transport chain                                                            | P    | 0.00000058 | 1.6E-10             | 26              | 295                  | 436              | 25263                       | over       |
| GO:0009767 | photosynthetic electron transport chain                                             | P    | 0.000011   | 4.7E-09             | 14              | 90                   | 448              | 25468                       | over       |
| GO:0019684 | photosynthesis, light reaction generation of precursor metabolites and energy       | P    | 0.000016   | 8.5E-09             | 19              | 192                  | 443              | 25366                       | over       |
| GO:0006091 | photosynthetic membrane                                                             | P    | 0.00078    | 0.00000053          | 31              | 608                  | 431              | 24950                       | over       |
| GO:0034357 | thylakoid part                                                                      | C    | 0.0013     | 0.0000011           | 31              | 629                  | 431              | 24929                       | over       |
| GO:0044436 | thylakoid part                                                                      | C    | 0.0033     | 0.0000031           | 31              | 665                  | 431              | 24893                       | over       |
| GO:0009521 | photosystem                                                                         | C    | 0.0034     | 0.0000037           | 12              | 118                  | 450              | 25440                       | over       |
| GO:0018298 | protein-chromophore linkage                                                         | P    | 0.0052     | 0.0000065           | 6               | 21                   | 456              | 25537                       | over       |
| GO:0016168 | chlorophyll binding transferase activity, transferring phosphorus-containing groups | F    | 0.0052     | 0.0000072           | 8               | 49                   | 454              | 25509                       | over       |
| GO:0016772 | thylakoid membrane                                                                  | F    | 0.0073     | 0.000011            | 81              | 2756                 | 381              | 22802                       | over       |
| GO:0042651 | chloroplast thylakoid membrane                                                      | C    | 0.0075     | 0.000012            | 28              | 610                  | 434              | 24948                       | over       |
| GO:0009535 | plastid thylakoid membrane                                                          | C    | 0.02       | 0.000037            | 26              | 580                  | 436              | 24978                       | over       |
| GO:0055035 | plastid thylakoid membrane                                                          | C    | 0.02       | 0.000038            | 26              | 581                  | 436              | 24977                       | over       |
| GO:0003824 | catalytic activity                                                                  | F    | 0.025      | 0.000052            | 272             | 12696                | 190              | 12862                       | over       |
| GO:0009579 | thylakoid                                                                           | C    | 0.031      | 0.000067            | 34              | 898                  | 428              | 24660                       | over       |
| GO:0009523 | photosystem II photosynthesis, light harvesting in                                  | C    | 0.032      | 0.000074            | 8               | 70                   | 454              | 25488                       | over       |
| GO:0009769 | photosystem II                                                                      | P    | 0.043      | 0.00011             | 3               | 3                    | 459              | 25555                       | over       |



c)

| GO Term    | Name                                                                   | Type | FDR         | single test p-Value | # in test group | # in reference group | # non annot test | # non annot reference group | Over/Under |
|------------|------------------------------------------------------------------------|------|-------------|---------------------|-----------------|----------------------|------------------|-----------------------------|------------|
| GO:0015979 | photosynthesis                                                         | P    | 3.6E-09     | 4.9E-13             | 28              | 319                  | 359              | 25314                       | over       |
| GO:0022900 | electron transport chain                                               | P    | 0.000000071 | 1.9E-11             | 25              | 296                  | 362              | 25337                       | over       |
| GO:0019684 | photosynthesis, light reaction                                         | P    | 0.000000089 | 4.7E-10             | 19              | 192                  | 368              | 25441                       | over       |
| GO:0009767 | photosynthetic electron transport chain                                | P    | 0.000000089 | 4.9E-10             | 14              | 90                   | 373              | 25543                       | over       |
| GO:0034357 | photosynthetic membrane generation of precursor metabolites and energy | C    | 0.00011     | 0.000000073         | 30              | 630                  | 357              | 25003                       | over       |
| GO:0006091 | energy                                                                 | P    | 0.00015     | 0.00000013          | 29              | 610                  | 358              | 25023                       | over       |
| GO:0044436 | thylakoid part                                                         | C    | 0.00024     | 0.00000023          | 30              | 666                  | 357              | 24967                       | over       |
| GO:0009521 | photosystem                                                            | C    | 0.00054     | 0.00000059          | 12              | 118                  | 375              | 25515                       | over       |
| GO:0042651 | thylakoid membrane                                                     | C    | 0.0011      | 0.0000013           | 27              | 611                  | 360              | 25022                       | over       |
| GO:0016168 | chlorophyll binding                                                    | F    | 0.0014      | 0.0000019           | 8               | 49                   | 379              | 25584                       | over       |
| GO:0018298 | protein-chromophore linkage                                            | P    | 0.0016      | 0.0000024           | 6               | 21                   | 381              | 25612                       | over       |
| GO:0009579 | thylakoid                                                              | C    | 0.0027      | 0.0000044           | 33              | 899                  | 354              | 24734                       | over       |
| GO:0009535 | chloroplast thylakoid membrane                                         | C    | 0.0028      | 0.0000051           | 25              | 581                  | 362              | 25052                       | over       |
| GO:0055035 | plastid thylakoid membrane                                             | C    | 0.0028      | 0.0000053           | 25              | 582                  | 362              | 25051                       | over       |
| GO:0009523 | photosystem II photosynthesis, light harvesting in photosystem II      | C    | 0.01        | 0.000021            | 8               | 70                   | 379              | 25563                       | over       |
| GO:0009769 | photosystem II                                                         | P    | 0.029       | 0.000063            | 3               | 3                    | 384              | 25630                       | over       |
| GO:0009534 | chloroplast thylakoid                                                  | C    | 0.034       | 0.000085            | 26              | 736                  | 361              | 24897                       | over       |
| GO:0031976 | plastid thylakoid                                                      | C    | 0.034       | 0.000085            | 26              | 736                  | 361              | 24897                       | over       |
| GO:0031984 | organelle subcompartment                                               | C    | 0.04        | 0.0001              | 26              | 746                  | 361              | 24887                       | over       |
| GO:0055114 | oxidation-reduction process                                            | P    | 0.045       | 0.00012             | 57              | 2268                 | 330              | 23365                       | over       |

d)

| GO Term    | Name                                                                           | Type | FDR        | single test p-Value | # in test group | # in reference group | # non annot test | # non annot reference group | Over/Under |
|------------|--------------------------------------------------------------------------------|------|------------|---------------------|-----------------|----------------------|------------------|-----------------------------|------------|
| GO:0015979 | photosynthesis                                                                 | P    | 4.3E-10    | 5.9E-14             | 24              | 323                  | 227              | 25446                       | over       |
| GO:0022900 | electron transport chain                                                       | P    | 0.00000019 | 5.3E-11             | 20              | 301                  | 231              | 25468                       | over       |
| GO:0034357 | photosynthetic membrane                                                        | C    | 0.00000077 | 3.1E-10             | 27              | 633                  | 224              | 25136                       | over       |
| GO:0044436 | thylakoid part                                                                 | C    | 0.0000018  | 0.00000001          | 27              | 669                  | 224              | 25100                       | over       |
| GO:0019684 | photosynthesis, light reaction                                                 | P    | 0.0000035  | 2.4E-09             | 15              | 196                  | 236              | 25573                       | over       |
| GO:0009521 | photosystem                                                                    | C    | 0.0000057  | 5.3E-09             | 12              | 118                  | 239              | 25651                       | over       |
| GO:0009767 | photosynthetic electron transport chain                                        | P    | 0.0000057  | 5.5E-09             | 11              | 93                   | 240              | 25676                       | over       |
| GO:0042651 | thylakoid membrane generation of precursor metabolites and energy              | C    | 0.000014   | 0.000000016         | 24              | 614                  | 227              | 25155                       | over       |
| GO:0006091 | chloroplast thylakoid membrane                                                 | P    | 0.000014   | 0.000000017         | 24              | 615                  | 227              | 25154                       | over       |
| GO:0009535 | plastid thylakoid membrane                                                     | C    | 0.000083   | 0.00000012          | 22              | 584                  | 229              | 25185                       | over       |
| GO:0055035 | protein-chromophore linkage                                                    | C    | 0.000083   | 0.00000013          | 22              | 585                  | 229              | 25184                       | over       |
| GO:0018298 | thylakoid                                                                      | P    | 0.00012    | 0.00000019          | 6               | 21                   | 245              | 25748                       | over       |
| GO:0009579 | chlorophyll binding                                                            | C    | 0.00023    | 0.00000041          | 27              | 905                  | 224              | 24864                       | over       |
| GO:0016168 | chloroplast thylakoid                                                          | F    | 0.00065    | 0.0000013           | 7               | 50                   | 244              | 25719                       | over       |
| GO:0009534 | plastid thylakoid                                                              | C    | 0.0025     | 0.0000054           | 22              | 740                  | 229              | 25029                       | over       |
| GO:0031976 | organelle subcompartment                                                       | C    | 0.0025     | 0.0000054           | 22              | 740                  | 229              | 25029                       | over       |
| GO:0031984 | photosystem II photosynthesis, light harvesting in                             | C    | 0.0028     | 0.0000066           | 22              | 750                  | 229              | 25019                       | over       |
| GO:0009523 | photosystem II transferase activity, transferring phosphorus-containing groups | C    | 0.0043     | 0.000011            | 7               | 71                   | 244              | 25698                       | over       |
| GO:0009769 | photosystem II catalytic activity                                              | P    | 0.0066     | 0.000017            | 3               | 3                    | 248              | 25766                       | over       |
| GO:0016772 | chlorophyllase activity                                                        | F    | 0.0066     | 0.000018            | 50              | 2787                 | 201              | 22982                       | over       |
| GO:0003824 |                                                                                | F    | 0.011      | 0.000031            | 157             | 12811                | 94               | 12958                       | over       |
| GO:0047746 |                                                                                | F    | 0.031      | 0.000093            | 2               | 0                    | 249              | 25769                       | over       |

**Table S2** Number of SNPs between each pair of accessions. See Figure 3.

|         | F1_1 | A1_73      | A1_97      | A1_155     | A2_4       | A2_34      | A2_255     | A2_1011    | Maxxa.A    | Maxxa.D    | D5_2       | D5_4       | D5_31      | D5_53      |
|---------|------|------------|------------|------------|------------|------------|------------|------------|------------|------------|------------|------------|------------|------------|
| F1_1    | -    | 17,564,992 | 21,305,598 | 22,079,020 | 21,859,715 | 21,674,508 | 20,679,406 | 21,408,246 | 20,291,884 | 29,073,437 | 33,767,585 | 34,170,146 | 34,562,572 | 34,557,441 |
| A1_73   | -    | -          | 3,631,045  | 3,900,567  | 6,303,268  | 6,215,005  | 6,012,594  | 6,207,091  | 6,300,220  | 22,400,730 | 24,134,306 | 24,443,485 | 24,723,105 | 24,722,179 |
| A1_97   | -    | -          | -          | 4,946,396  | 7,328,205  | 7,031,582  | 7,073,657  | 7,155,650  | 7,780,968  | 27,700,097 | 30,348,697 | 30,730,738 | 31,096,279 | 31,093,916 |
| A1_155  | -    | -          | -          | -          | 7,403,173  | 7,229,834  | 7,156,740  | 7,560,136  | 7,998,112  | 28,828,413 | 31,885,907 | 32,291,549 | 32,693,266 | 32,691,124 |
| A2_4    | -    | -          | -          | -          | -          | 3,716,422  | 3,707,066  | 4,168,039  | 7,903,834  | 28,578,818 | 31,594,908 | 31,999,160 | 32,392,725 | 32,391,137 |
| A2_34   | -    | -          | -          | -          | -          | -          | 3,728,031  | 3,850,083  | 7,864,907  | 28,272,425 | 31,234,868 | 31,581,814 | 31,889,687 | 31,886,283 |
| A2_255  | -    | -          | -          | -          | -          | -          | -          | 4,013,599  | 7,354,551  | 27,224,622 | 30,223,121 | 30,521,981 | 30,788,394 | 30,784,707 |
| A2_1011 | -    | -          | -          | -          | -          | -          | -          | -          | 7,887,558  | 27,866,733 | 30,820,039 | 31,120,155 | 31,340,231 | 31,338,170 |
| Maxxa.A | -    | -          | -          | -          | -          | -          | -          | -          | -          | 26,728,016 | 29,477,752 | 29,839,383 | 30,196,553 | 30,191,703 |
| Maxxa.D | -    | -          | -          | -          | -          | -          | -          | -          | -          | -          | 8,277,247  | 8,374,774  | 8,468,863  | 8,465,441  |
| D5_2    | -    | -          | -          | -          | -          | -          | -          | -          | -          | -          | -          | 224,283    | 218,142    | 223,665    |
| D5_4    | -    | -          | -          | -          | -          | -          | -          | -          | -          | -          | -          | -          | 235,864    | 244,890    |
| D5_31   | -    | -          | -          | -          | -          | -          | -          | -          | -          | -          | -          | -          | -          | 78,686     |
| D5_53   | -    | -          | -          | -          | -          | -          | -          | -          | -          | -          | -          | -          | -          | -          |

**Table S3** Table of genes (a) and GO terms (b) enriched in A-genome deleted genes.

Available for download at <http://www.g3journal.org/lookup/suppl/doi:10.1534/g3.113.007229/-/DC1>
