# Supplementary material for: Insights into the Evolution of Cotton Diploids and Polyploids from Whole-Genome Re-sequencing
Source: PubMed Central journal article supplement (PMC3789805; doi:10.1534/g3.113.007229), 2013-10-01
Supplement: supp_g3.113.007229_FigureS2.pdf [file supp_g3.113.007229_FigureS2.pdf]

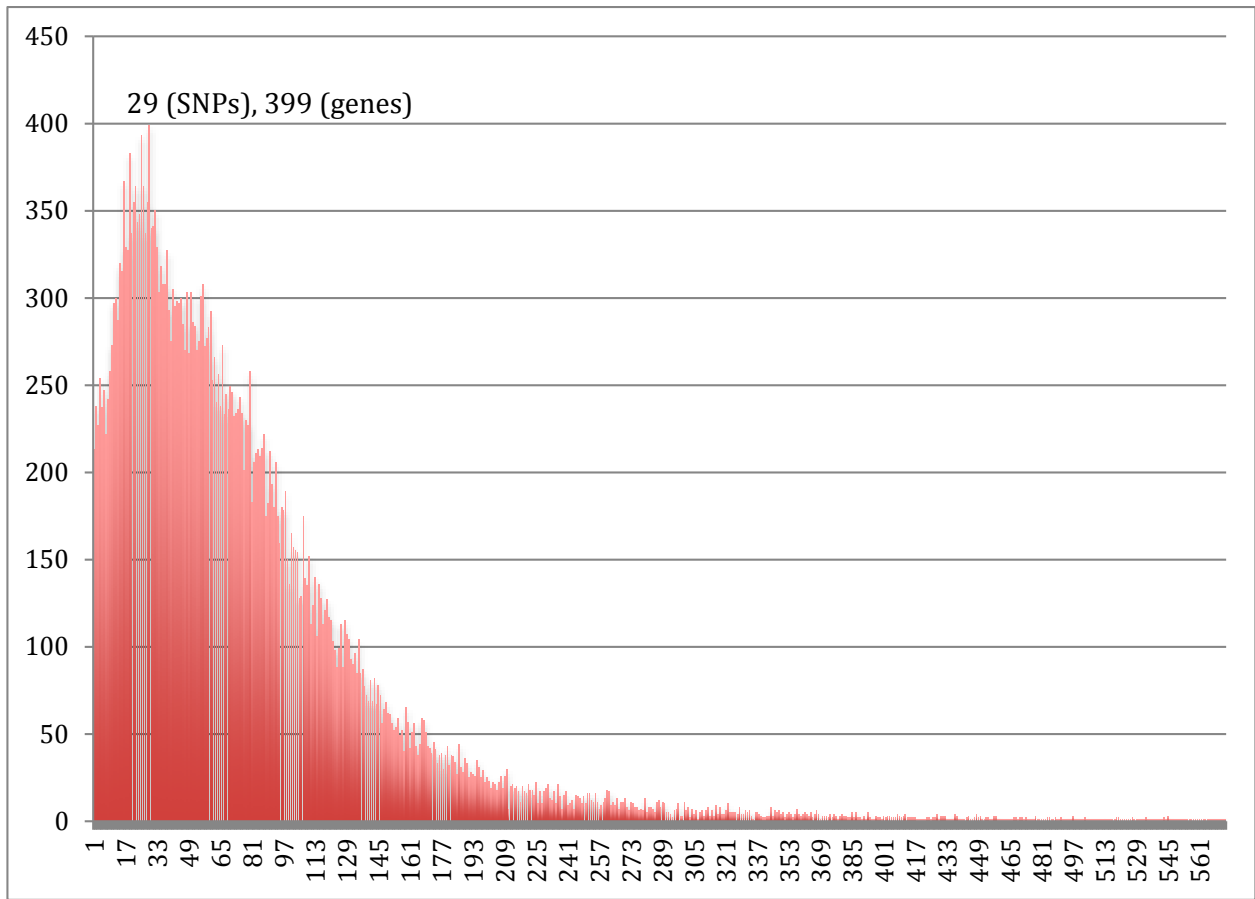

**Figure S2** Histogram of the number of homoeo-SNPs (x-axis) per gene (y-axis). Most genes had 30-40 homoeo-SNPs.
