# Supplementary material for: Insights into the Evolution of Cotton Diploids and Polyploids from Whole-Genome Re-sequencing
Source: PubMed Central journal article supplement (PMC3789805; doi:10.1534/g3.113.007229), 2013-10-01
Supplement: supp_g3.113.007229_FigureS3.pdf [file supp_g3.113.007229_FigureS3.pdf]

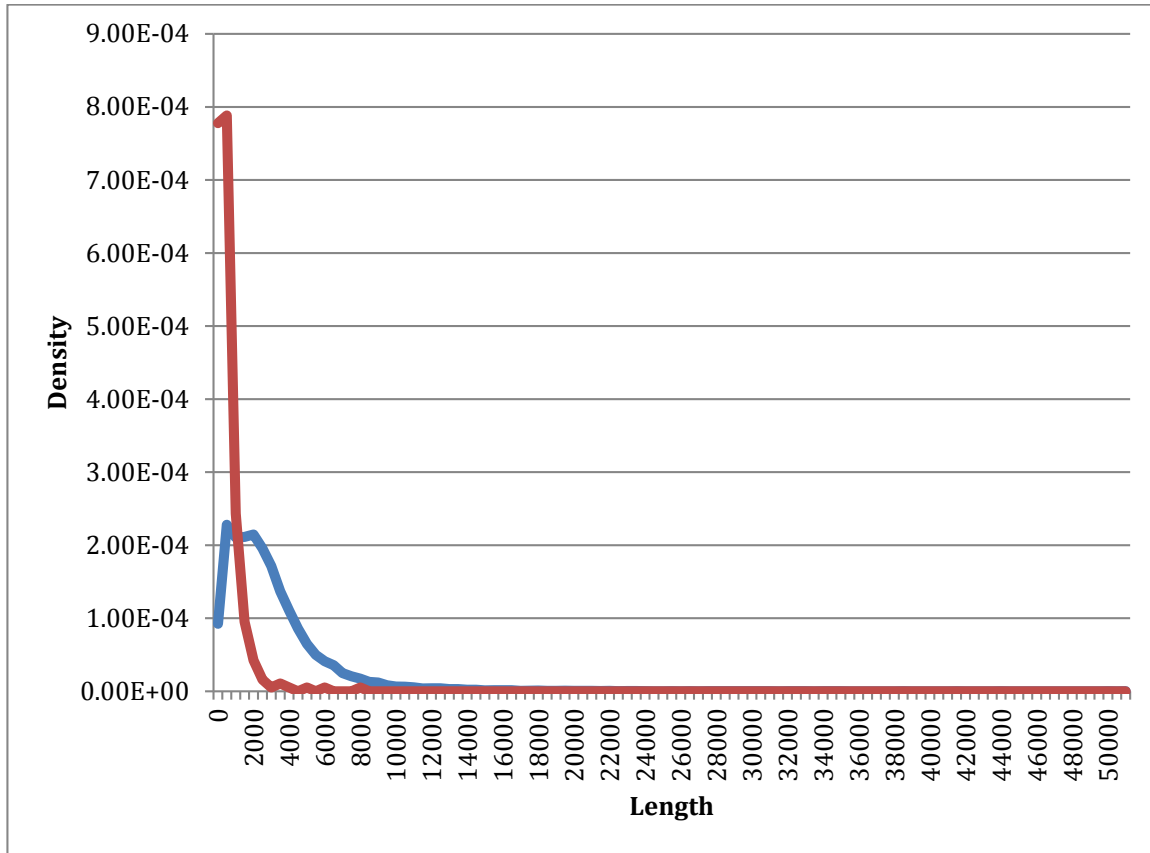

**Figure S3** The length distribution of genes without any SNPs and present in both genomes (red; N = 378) and the length distribution of all annotated genes (blue; N = 37,223).
