# Supplementary material for: Insights into the Evolution of Cotton Diploids and Polyploids from Whole-Genome Re-sequencing
Source: PubMed Central journal article supplement (PMC3789805; doi:10.1534/g3.113.007229), 2013-10-01
Supplement: supp_g3.113.007229_FigureS4.pdf [file supp_g3.113.007229_FigureS4.pdf]

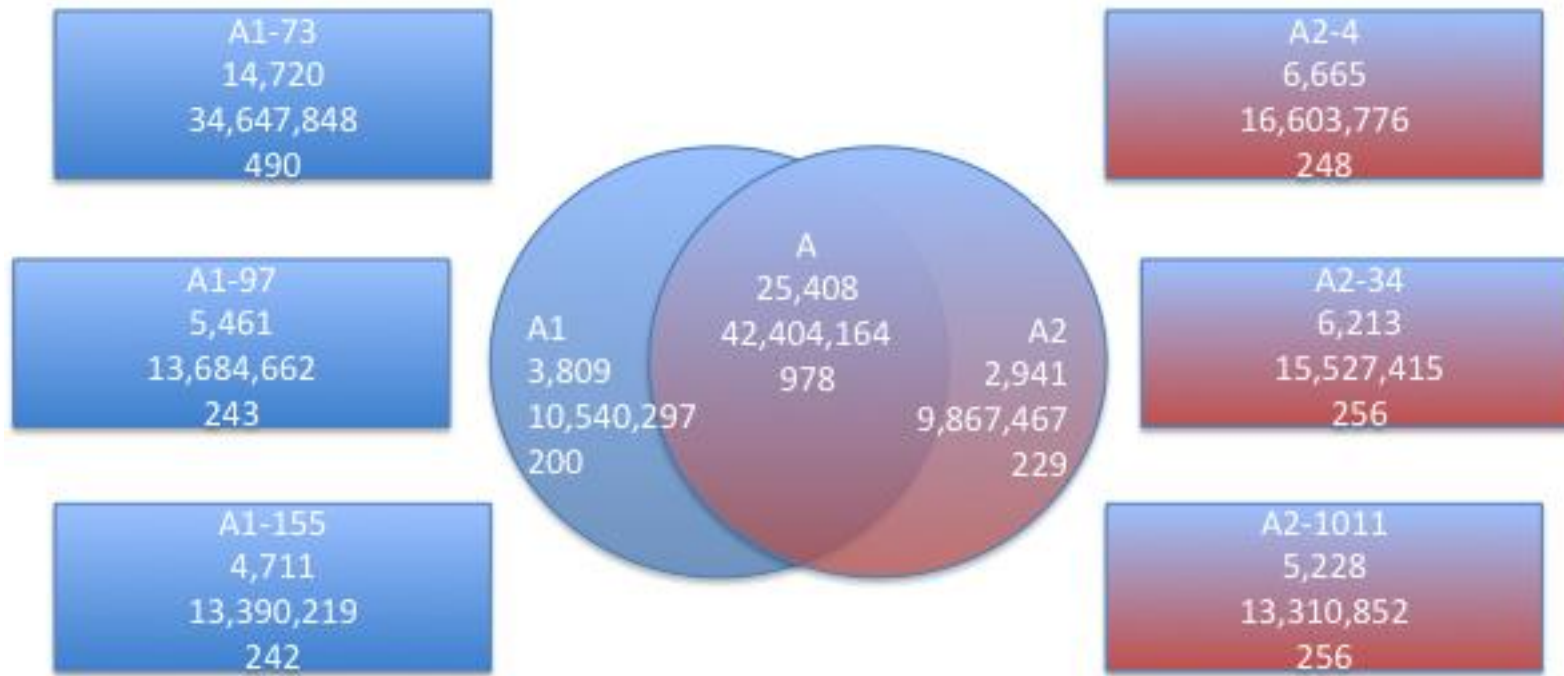

**Figure S4** A summary of the genomic deletions detected in the A-genome when sequencing reads were mapped to the D-genome reference. Each shape contains 1) accession ID, 2) the total number of deletions, 3) the sum total length of deletions in base-pairs, and 4) the number of deleted genes. Blue shapes indicate A<sub>1</sub>, and blue shapes indicate A<sub>2</sub>.
