# Supplementary material for: Insights into the Evolution of Cotton Diploids and Polyploids from Whole-Genome Re-sequencing
Source: PubMed Central journal article supplement (PMC3789805; doi:10.1534/g3.113.007229), 2013-10-01
Supplement: supp_g3.113.007229_TableS2.pdf [file supp_g3.113.007229_TableS2.pdf]

**Table S2** Number of SNPs between each pair of accessions. See Figure 3.

|         | F1_1 | A1_73      | A1_97      | A1_155     | A2_4       | A2_34      | A2_255     | A2_1011    | Maxxa.A    | Maxxa.D    | D5_2       | D5_4       | D5_31      | D5_53      |
|---------|------|------------|------------|------------|------------|------------|------------|------------|------------|------------|------------|------------|------------|------------|
| F1_1    | -    | 17,564,992 | 21,305,598 | 22,079,020 | 21,859,715 | 21,674,508 | 20,679,406 | 21,408,246 | 20,291,884 | 29,073,437 | 33,767,585 | 34,170,146 | 34,562,572 | 34,557,441 |
| A1_73   | -    | -          | 3,631,045  | 3,900,567  | 6,303,268  | 6,215,005  | 6,012,594  | 6,207,091  | 6,300,220  | 22,400,730 | 24,134,306 | 24,443,485 | 24,723,105 | 24,722,179 |
| A1_97   | -    | -          | -          | 4,946,396  | 7,328,205  | 7,031,582  | 7,073,657  | 7,155,650  | 7,780,968  | 27,700,097 | 30,348,697 | 30,730,738 | 31,096,279 | 31,093,916 |
| A1_155  | -    | -          | -          | -          | 7,403,173  | 7,229,834  | 7,156,740  | 7,560,136  | 7,998,112  | 28,828,413 | 31,885,907 | 32,291,549 | 32,693,266 | 32,691,124 |
| A2_4    | -    | -          | -          | -          | -          | 3,716,422  | 3,707,066  | 4,168,039  | 7,903,834  | 28,578,818 | 31,594,908 | 31,999,160 | 32,392,725 | 32,391,137 |
| A2_34   | -    | -          | -          | -          | -          | -          | 3,728,031  | 3,850,083  | 7,864,907  | 28,272,425 | 31,234,868 | 31,581,814 | 31,889,687 | 31,886,283 |
| A2_255  | -    | -          | -          | -          | -          | -          | -          | 4,013,599  | 7,354,551  | 27,224,622 | 30,223,121 | 30,521,981 | 30,788,394 | 30,784,707 |
| A2_1011 | -    | -          | -          | -          | -          | -          | -          | -          | 7,887,558  | 27,866,733 | 30,820,039 | 31,120,155 | 31,340,231 | 31,338,170 |
| Maxxa.A | -    | -          | -          | -          | -          | -          | -          | -          | -          | 26,728,016 | 29,477,752 | 29,839,383 | 30,196,553 | 30,191,703 |
| Maxxa.D | -    | -          | -          | -          | -          | -          | -          | -          | -          | -          | 8,277,247  | 8,374,774  | 8,468,863  | 8,465,441  |
| D5_2    | -    | -          | -          | -          | -          | -          | -          | -          | -          | -          | -          | 224,283    | 218,142    | 223,665    |
| D5_4    | -    | -          | -          | -          | -          | -          | -          | -          | -          | -          | -          | -          | 235,864    | 244,890    |
| D5_31   | -    | -          | -          | -          | -          | -          | -          | -          | -          | -          | -          | -          | -          | 78,686     |
| D5_53   | -    | -          | -          | -          | -          | -          | -          | -          | -          | -          | -          | -          | -          | -          |
